# Supplementary material
Source: MDPI journal article supplement (https://www.mdpi.com/2073-4433/12/5/645)
Supplement: s1 [file s1]

## Supplementary Materials

# Improving Air Pollutant Metal Oxide Sensor Quantification Practices through: an Exploration of Sensor Signal Normalization, Multi-sensor and Universal Calibration Model Generation, and Physical Factors Such as Co-location Duration and Sensor Age

Kristen Okorn <sup>1,\*</sup> and Michael Hannigan <sup>2</sup>

<sup>1</sup> Environmental Engineering, University of Colorado Boulder, Boulder, CO 80309, USA

<sup>2</sup> Mechanical Engineering, University of Colorado Boulder, Boulder, CO 80309, USA;

Michael.Hannigan@Colorado.edu

\*Correspondence: E: Kristen.Okorn@colorado.edu, P: (303) 735-8054

Table S1. Colocation Reference Instruments.

| Location                          |  | Gas             | Reference Instrument                                                 | Responsible Agency                                         |
|-----------------------------------|--|-----------------|----------------------------------------------------------------------|------------------------------------------------------------|
| Boulder, CO – South Boulder Creek |  | O <sub>3</sub>  | Teledyne Model 400E Photometric Ozone Analyzer                       | Colorado Department of Public Health & Environment (CDPHE) |
| Boulder, CO – Boulder Campus      |  | O <sub>3</sub>  | Continuous UV absorption Thermo-Scientific Ozone Monitor (49c, 3711) | National Oceanic and Atmospheric Administration (NOAA)     |
| Shafter, CA                       |  | O <sub>3</sub>  | Teledyne API T400 Ozone Analyzer                                     | California Air Resources Board                             |
| Los Angeles, CA                   |  | CH <sub>4</sub> | Picarro CRDS*                                                        | South Coast Air Quality Management District (SCAQMD)       |
| Los Angeles, CA                   |  | CH <sub>4</sub> | Thermo Scientific 55i                                                | South Coast Air Quality Management District (SCAQMD)       |
| Wiggins, CO                       |  | O <sub>3</sub>  | N/A                                                                  | N/A                                                        |
| Greeley, CO                       |  | CH <sub>4</sub> | Los Gatos                                                            | South Coast Air Quality Management District (SCAQMD)       |

\* - Primary reference instrument

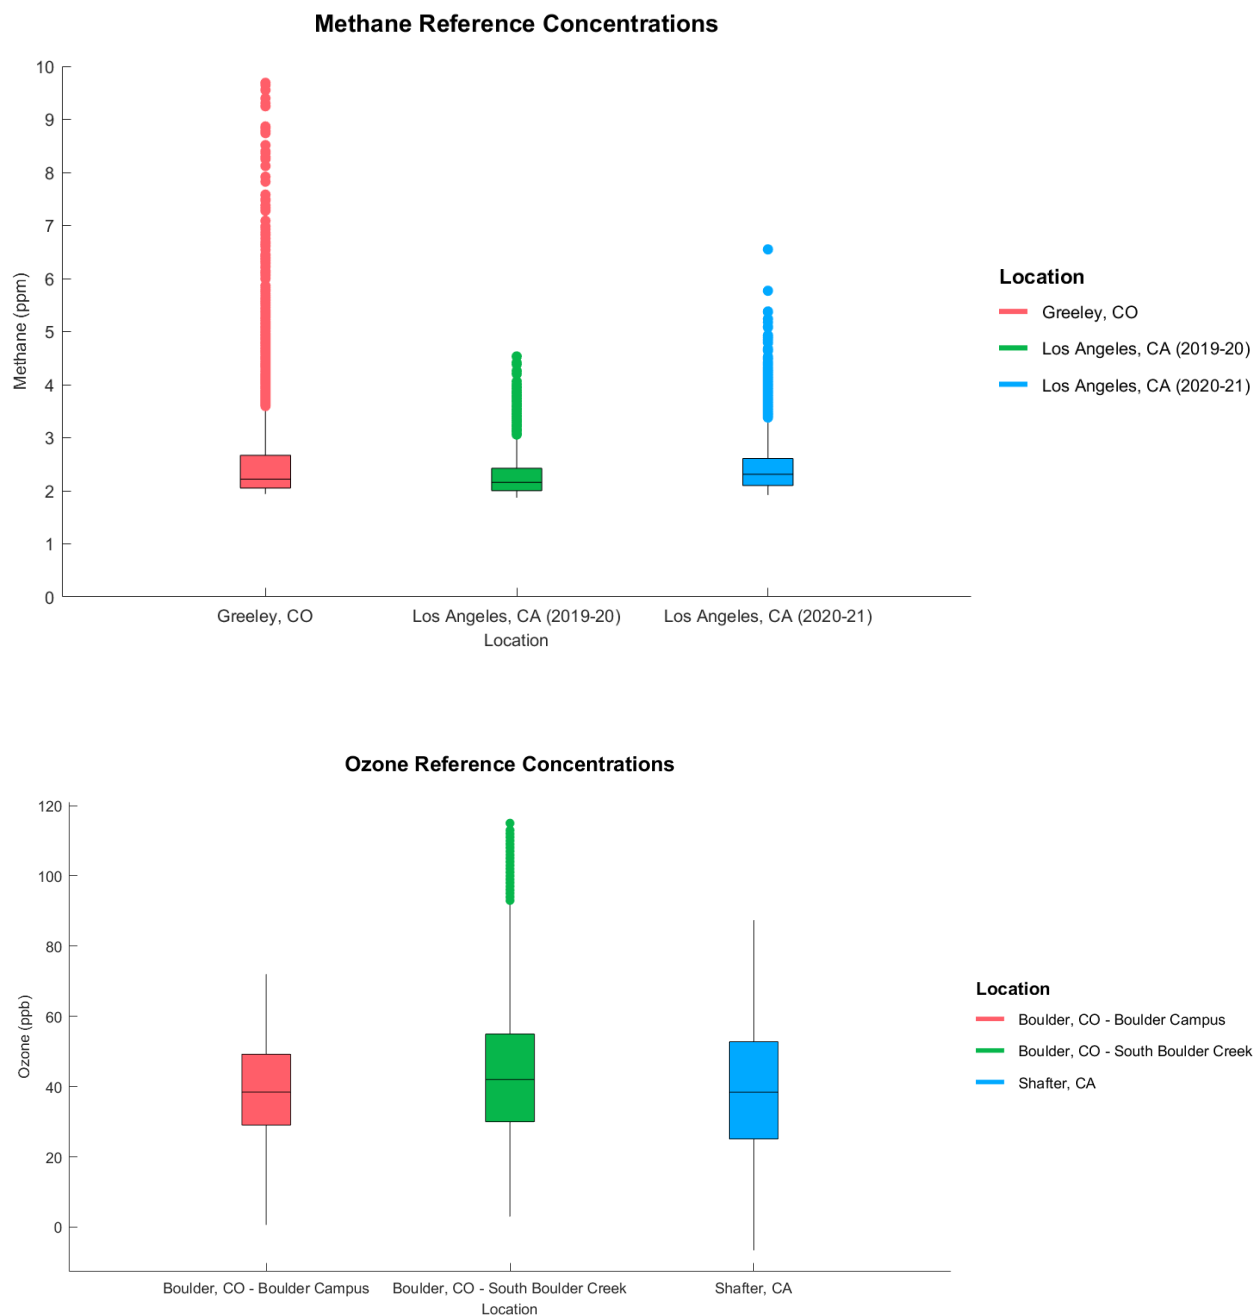

Figure S1. Reference Instrument Concentrations for methane (top) and ozone (bottom).

Table S2: Calibration and Validation Data Split and Rationale

| Application                                           | Section           | Pollutant       | Calibration                          |                     | Validation          |                | Rationale                                                                                                                                  |
|-------------------------------------------------------|-------------------|-----------------|--------------------------------------|---------------------|---------------------|----------------|--------------------------------------------------------------------------------------------------------------------------------------------|
|                                                       |                   |                 | Dates                                | Location            | Dates               | Location       |                                                                                                                                            |
| Applying Calibration Models                           | 3.1.1, 3.3.1, 3.6 | CH <sub>4</sub> | 9/24/19 - 10/18/19                   | Los Angeles         | 11/12/19 - 12/25/19 | Los Angeles    | Different months of data selected – slight differences in temperature & humidity spaces over time                                          |
|                                                       | 3.1.1, 3.3.1, 3.6 | CH <sub>4</sub> | 8/31/20 - 9/24/20                    | Greeley             | 4/20/20 - 4/28/20   | Wiggins        | Reference data needed for calibration (only available at Greeley); Wiggins validation by default                                           |
|                                                       | 3.1.2             | O <sub>3</sub>  | 2/13/19 - 2/19/19, 9/13/19 - 9/23/19 | Shafter             | 6/12/19 - 6/19/19   | Shafter        | 2 weeks of calibration data "bookend"<br>1 week of validation data                                                                         |
|                                                       | 3.1.2             | O <sub>3</sub>  | 6/15/15 - 6/25/15                    | South Boulder Creek | 6/11/15 - 6/18/15   | Boulder Campus | 2 different sets of pods and reference instruments; randomly selected one set as calibration and the other as validation                   |
| Length of Colocation / Multiple Reference Instruments | 3.2               | CH <sub>4</sub> | 11/25/19 - 1/18/20                   | Los Angeles         | 11/25/19 - 1/18/20  | Los Angeles    | Calibration & validation randomly selected during period of greatest instrument overlap; previous calibration becomes validation 2         |
| Co-locating & deploying sensors in different          | 3.4               | CH <sub>4</sub> | 9/24/19 - 10/18/19                   | Los Angeles         | 8/31/20 - 9/24/20   | Greeley        | Same CA calibration data used, Greeley data used as validation due to lack of a reference instrument at original validation site (Wiggins) |

|                |     |                 |                   |             |                    |             |                                                                                                 |
|----------------|-----|-----------------|-------------------|-------------|--------------------|-------------|-------------------------------------------------------------------------------------------------|
| environments   |     |                 |                   |             |                    |             |                                                                                                 |
| Age of sensors | 3.5 | CH <sub>4</sub> | 11/13/20 - 1/7/21 | Los Angeles | 9/24/19 - 10/18/19 | Los Angeles | New LA calibration data used (post sensor replacement), original 2019 CA data now as validation |

Table S3: Measures of fit for methane calibration models

| Method       | Colorado Calibration |        |       |       | California Calibration |        |       |        | California Validation |        |       |        |
|--------------|----------------------|--------|-------|-------|------------------------|--------|-------|--------|-----------------------|--------|-------|--------|
|              | R <sup>2</sup>       | MBE    | CRMSD | RMSE  | R <sup>2</sup>         | MBE    | CRMSD | RMSE   | R <sup>2</sup>        | MBE    | CRMSD | RMSE   |
| Individual   | 0.696                | 0.000  | 0.279 | 0.269 | 0.823                  | 0.000  | 0.138 | 0.0471 | 0.780                 | 0.388  | 0.148 | 0.0453 |
|              | 0.685                | 0.000  | 0.294 | 0.274 | 0.785                  | 0.000  | 0.148 | 0.0319 | 0.786                 | 0.044  | 0.152 | 0.0369 |
|              | 0.673                | 0.000  | 0.279 | 0.279 | 0.793                  | 0.000  | 0.140 | 0.0485 | 0.793                 | -0.980 | 0.222 | 0.0465 |
|              | 0.665                | 0.000  | 0.290 | 0.290 | 0.808                  | 0.000  | 0.142 | 0.0344 | 0.799                 | -0.821 | 0.193 | -      |
|              | 0.690                | 0.000  | -     | 0.272 | 0.807                  | -      | -     | -      | -                     | -      | -     | -      |
|              | 0.694                | 0.000  | -     | 0.270 | 0.774                  | -      | -     | -      | -                     | -      | -     | -      |
|              | -                    | -      | -     | -     | 0.806                  | -      | -     | -      | -                     | -      | -     | -      |
|              | -                    | -      | -     | -     | 0.785                  | -      | -     | -      | -                     | -      | -     | -      |
|              | -                    | -      | -     | -     | 0.811                  | -      | -     | -      | -                     | -      | -     | -      |
| Z-individual | 0.708                | 0.000  | 0.061 | 0.264 | 0.798                  | 0.000  | 0.135 | 0.135  | 0.791                 | 0.041  | 0.149 | 0.1703 |
|              | 0.699                | 0.000  | 0.069 | 0.268 | 0.793                  | 0.000  | 0.137 | 0.137  | 0.794                 | 0.041  | 0.149 | 0.1703 |
|              | 0.709                | 0.038  | 0.074 | 0.263 | 0.797                  | 0.000  | 0.135 | 0.136  | 0.804                 | -0.027 | 0.162 | 0.187  |
|              | 0.672                | 0.000  | 0.082 | 0.287 | 0.805                  | 0.000  | 0.133 | 0.133  | -                     | 0.013  | 0.151 | 0.1712 |
|              | 0.721                | 0.000  | 0.084 | 0.258 | -                      | -      | -     | -      | -                     | -      | -     | -      |
|              | 0.712                | -      | -     | 0.262 | -                      | -      | -     | -      | -                     | -      | -     | -      |
| Median       | 0.705                | 0.000  | 0.264 | 0.261 | 0.822                  | 0.009  | 0.140 | 0.040  | 0.687                 | -0.044 | 0.163 | 0.0413 |
|              | 0.696                | 0.000  | 0.268 | 0.271 | 0.773                  | -0.005 | 0.137 | 0.042  | 0.677                 | -0.052 | 0.164 | 0.0682 |
|              | 0.672                | 0.000  | 0.263 | 0.282 | 0.778                  | -0.008 | 0.156 | 0.048  | 0.595                 | -0.056 | 0.175 | 0.1481 |
|              | 0.697                | 0.000  | 0.000 | 0.270 | 0.801                  | 0.038  | 0.137 | 0.111  | 0.463                 | 0.028  | 0.191 | 0.0456 |
|              | 0.702                | 0.000  | 0.258 | 0.276 | 0.804                  | 0.016  | 0.140 | 0.053  | 0.648                 | -0.051 | 0.165 | -      |
|              | -                    | 0.000  | 0.262 | -     | 0.765                  | -0.009 | 0.149 | 0.053  | -                     | -      | -     | -      |
|              | -                    | -      | -     | -     | 0.805                  | -0.004 | 0.130 | 0.046  | -                     | -      | -     | -      |
|              | -                    | -      | -     | -     | 0.782                  | 0.006  | 0.142 | 0.034  | -                     | -      | -     | -      |
|              | -                    | -      | -     | -     | 0.804                  | 0.003  | 0.136 | 0.031  | -                     | -      | -     | -      |
|              | 0.696                | -0.022 | 0.279 | 0.279 | 0.781                  | 0.000  | 0.142 | 0.508  | 0.768                 | 0.213  | 0.154 | 0.0431 |
|              | 0.651                | -0.018 | 0.293 | 0.294 | 0.791                  | 0.000  | 0.138 | 0.037  | 0.783                 | 0.192  | 0.169 | 0.0378 |

|                             |       |        |       |       |       |        |        |       |       |       |       |        |
|-----------------------------|-------|--------|-------|-------|-------|--------|--------|-------|-------|-------|-------|--------|
| Sensor Signal Normalization | 0.687 | -0.007 | 0.279 | 0.279 | 0.765 | 0.004  | 0.140  | 0.060 | 0.791 | 0.211 | 0.154 | 0.0421 |
|                             | 0.694 | -0.079 | 0.279 | 0.290 | 0.798 | 0.000  | 0.137  | 0.038 | -     | -     | -     | -      |
| One-Cal                     | 0.676 | -0.026 | 0.276 | 0.272 | 0.827 | 0.009  | -0.099 | 0.043 | 0.757 | 0.146 | 0.164 | 0.2028 |
|                             | 0.637 | -0.014 | 0.297 | 0.300 | 0.778 | -0.004 | -0.100 | 0.042 | 0.759 | 0.140 | 0.159 | 0.1935 |
|                             | 0.639 | -0.017 | 0.280 | 0.300 | 0.795 | -0.008 | -0.107 | 0.050 | 0.745 | 0.140 | 0.156 | 0.1906 |
|                             | 0.656 | -0.026 | 0.274 | 0.291 | 0.778 | 0.016  | -      | 0.101 | 0.729 | 0.139 | -     | -      |
|                             | 0.668 | -      | -     | 0.295 | 0.798 | -0.009 | -      | 0.056 | 0.761 | 0.146 | -     | -      |
| One-Hop                     | 0.678 | -0.043 | 0.336 | 0.275 | 0.827 | 0.006  | 0.109  | 0.027 | 0.757 | 0.000 | 0.133 | 0.1821 |
|                             | 0.716 | -0.129 | 0.333 | 0.242 | 0.797 | 0.003  | 0.141  | 0.039 | 0.700 | 0.000 | 0.138 | 0.1038 |
|                             | 0.514 | 0.068  | 0.380 | 0.381 | 0.806 | 0.005  | 0.110  | 0.039 | 0.688 | 0.000 | 0.141 | 0.1161 |
|                             | 0.583 | -0.160 | 0.442 | 0.316 | 0.845 | -0.004 | 0.139  | 0.027 | 0.635 | 0.000 | 0.138 | 0.1473 |
|                             | 0.380 | -      | -     | 0.401 | 0.782 | -      | -      | -     | 0.705 | 0.000 | 0.136 | -      |
|                             | 0.643 | -      | -     | 0.421 | -     | -      | -      | -     | -     | -     | -     | -      |

Table S4: Measures of fit for ozone calibration methods

| Method     | Colorado Calibration |       |           |          | Colorado Validation |       |           |          | California Calibration |        |           |          | California Validation |        |           |        |
|------------|----------------------|-------|-----------|----------|---------------------|-------|-----------|----------|------------------------|--------|-----------|----------|-----------------------|--------|-----------|--------|
|            | R <sup>2</sup>       | MBE   | CRMS<br>D | RMS<br>E | R <sup>2</sup>      | MBE   | CRMS<br>D | RMS<br>E | R <sup>2</sup>         | MBE    | CRMS<br>D | RMS<br>E | R <sup>2</sup>        | MBE    | CRMS<br>D | RMSE   |
| Individual | 0.934                | 0.000 | 4.895     | 4.988    | 0.960               | 0.000 | 10.816    | 4.333    | 0.816                  | -0.933 | 8.544     | 7.959    | 0.635                 | 19.302 | 11.615    | 20.073 |
|            | 0.885                | 0.051 | 6.478     | 6.572    | 0.901               | 0.000 | 10.859    | 6.149    | 0.804                  | -1.153 | 8.508     | 7.994    | 0.735                 | 18.959 | 10.754    | 19.736 |
|            | 0.797                | 0.070 | 8.548     | 8.723    | 0.800               | 0.000 | 2.508     | 8.748    | 0.829                  | -1.257 | 8.539     | 7.676    | 0.770                 | 21.636 | 11.803    | 25.685 |
|            | 0.652                | 0.000 | 9.988     | 10.666   | 0.765               | 0.000 | 10.516    | 7.647    | 0.832                  | -2.974 | 8.542     | 7.600    | 0.700                 | 20.416 | 10.853    | 30.093 |
|            | 0.470                | -     | -         | 9.225    | 0.148               | 0.021 | 10.638    | 12.874   | 0.820                  | -1.579 | 8.804     | 7.867    | 0.674                 | 14.918 | 10.360    | 30.697 |
|            | 0.465                | -     | -         | 9.222    | 0.093               | 0.019 | 10.714    | 13.251   | 0.802                  | -2.560 | 8.666     | 7.910    | 0.726                 | 16.113 | 10.816    | 9.080  |
|            | 0.473                | -     | -         | 9.132    | 0.103               | -     | -         | 13.092   | 0.834                  | -0.547 | 8.558     | 7.369    | 0.765                 | 19.827 | 11.562    | 33.456 |
|            | 0.492                | -     | -         | 9.018    | 0.116               | -     | -         | 13.201   | 0.817                  | -1.216 | 8.600     | 7.738    | 0.576                 | 19.163 | 11.427    | 36.961 |
|            | 0.469                | -     | -         | 9.191    | 0.120               | -     | -         | 13.076   | 0.863                  | -2.230 | 8.550     | 6.868    | 0.767                 | 18.767 | 10.846    | 47.966 |
|            | -                    | -     | -         | -        | -                   | -     | -         | -        | 0.840                  | -0.816 | 8.848     | 6.886    | 0.762                 | 11.924 | 11.083    | 27.298 |
|            | -                    | -     | -         | -        | -                   | -     | -         | -        | 0.849                  | -0.816 | 8.848     | 7.198    | 0.786                 | 21.505 | 11.925    | 26.491 |
|            | -                    | -     | -         | -        | -                   | -     | -         | -        | 0.849                  | -      | -         | 5.148    | 0.760                 | -      | -         | 24.753 |
|            | -                    | -     | -         | -        | -                   | -     | -         | -        | 0.937                  | -      | -         | -        | 0.918                 | -      | -         | 32.885 |

|          |       |        |        |        |       |        |        |        |       |         |        |        |       |         |         |         |
|----------|-------|--------|--------|--------|-------|--------|--------|--------|-------|---------|--------|--------|-------|---------|---------|---------|
| Z-Indiv. | 0.938 | 0.000  | 4.895  | 4.895  | 0.358 | 0.045  | 10.048 | 10.052 | 0.816 | -0.001  | 7.181  | 7.959  | 0.528 | -7.223  | 79.929  | 80.255  |
|          | 0.886 | 0.051  | 6.478  | 6.552  | 0.346 | 0.000  | 10.170 | 10.146 | 0.806 | -0.001  | 7.181  | 7.956  | 0.535 | -7.223  | 79.929  | 74.248  |
|          | 0.668 | 0.000  | 9.988  | 9.986  | 0.928 | 0.000  | 2.608  | 2.609  | 0.832 | 0.041   | 7.713  | 7.589  | 0.885 | -7.297  | 45.969  | 46.545  |
|          | -     | -      | -      | -      | 0.359 | 0.030  | 10.053 | 10.040 | 0.832 | -0.007  | 8.714  | 7.600  | 0.690 | 7.284   | 17.782  | 19.216  |
|          | -     | -      | -      | -      | 0.366 | 0.043  | 9.987  | 9.985  | 0.820 | 0.011   | 7.755  | 7.866  | 0.728 | -9.295  | 34.942  | 36.157  |
|          | -     | -      | -      | -      | 0.354 | 0.053  | 10.071 | 10.079 | 0.836 | 0.059   | 7.595  | 7.910  | 0.522 | -1.731  | 122.517 | 122.529 |
|          | -     | -      | -      | -      | -     | -      | -      | -      | 0.817 | -0.037  | 8.110  | 7.330  | 0.714 | 94.202  | 54.659  | 108.911 |
|          | -     | -      | -      | -      | -     | -      | -      | -      | 0.842 | 0.011   | 6.412  | 7.738  | 0.140 | 24.189  | 15.965  | 28.983  |
|          | -     | -      | -      | -      | -     | -      | -      | -      | 0.849 | -0.007  | 7.529  | 6.868  | 0.901 | 8.418   | 103.650 | 103.991 |
|          | -     | -      | -      | -      | -     | -      | -      | -      | -     | 0.026   | 6.970  | 6.852  | 0.539 | -17.142 | 103.602 | 105.011 |
|          | -     | -      | -      | -      | -     | -      | -      | -      | -     | 0.026   | 6.970  | 7.198  | -     | -20.810 | 67.489  | 70.624  |
| Median   | 0.934 | -0.996 | 5.174  | 5.269  | 0.633 | 5.099  | 21.825 | 13.202 | 0.782 | -24.375 | 20.490 | 28.397 | 0.344 | -18.746 | 13.949  | 23.366  |
|          | 0.884 | -1.373 | 6.732  | 7.004  | 0.662 | 4.684  | 27.711 | 4.020  | 0.826 | -3.560  | 7.295  | 10.018 | 0.476 | -16.843 | 18.455  | 24.986  |
|          | 0.706 | -1.292 | 10.786 | 10.617 | 0.648 | -8.461 | 21.383 | 11.942 | 0.825 | -3.560  | 7.295  | 7.783  | 0.842 | -16.843 | 18.455  | 27.316  |
|          | 0.548 | 3.783  | 13.479 | 13.997 | 0.636 | 4.728  | 26.346 | 13.498 | 0.805 | 1.089   | 7.563  | 7.805  | 0.536 | -16.592 | 18.012  | 24.489  |



|                           |       |        |        |        |       |       |        |        |       |         |       |        |       |         |        |        |
|---------------------------|-------|--------|--------|--------|-------|-------|--------|--------|-------|---------|-------|--------|-------|---------|--------|--------|
|                           | -     | -      | -      | -      | 0.633 | 4.912 | 17.967 | 13.083 | 0.794 | -0.302  | 8.880 | 8.468  | 0.344 | -18.704 | 13.925 | 23.319 |
|                           | -     | -      | -      | -      | -     | 4.889 | 18.990 | -      | 0.822 | 0.576   | 7.302 | 8.086  | 0.473 | -17.140 | 19.067 | 25.639 |
|                           | -     | -      | -      | -      | -     | -     | -      | -      | 0.230 | -1.363  | 7.436 | 7.644  | 0.541 | -16.561 | 20.406 | 26.281 |
|                           | -     | -      | -      | -      | -     | -     | -      | -      | 0.293 | -53.581 | 8.802 | 41.011 | 0.248 | -18.674 | 14.929 | 23.909 |
|                           | -     | -      | -      | -      | -     | -     | -      | -      | 0.713 | -52.080 | 9.977 | 39.333 | 0.840 | -15.506 | 25.856 | 30.149 |
|                           | -     | -      | -      | -      | -     | -     | -      | -      | 0.844 | -7.831  | 6.999 | 14.407 | 0.802 | -15.280 | 22.128 | 26.892 |
|                           | -     | -      | -      | -      | -     | -     | -      | -      | 0.844 | 0.895   | 7.446 | 7.344  | 0.603 | -15.759 | 19.327 | 24.937 |
|                           | -     | -      | -      | -      | -     | -     | -      | -      | 0.898 | 0.895   | 7.446 | 7.344  | 0.449 | -17.052 | 14.634 | 22.471 |
|                           | -     | -      | -      | -      | -     | -     | -      | -      | -     | -       | -     | -      | 0.755 | -       | -      | -      |
| Sensor<br>Signal<br>Norm. | 0.882 | 0.000  | 4.895  | 7.217  | -     | -     | -      | -      | 0.775 | -0.933  | 8.544 | 8.790  | 0.554 | 11.615  | 19.302 | 22.527 |
|                           | 0.727 | 2.776  | 6.711  | 10.640 | -     | -     | -      | -      | 0.816 | -1.153  | 8.508 | 8.405  | 0.615 | 10.754  | 18.959 | 21.797 |
|                           | 0.572 | 1.279  | 10.790 | 11.699 | -     | -     | -      | -      | 0.814 | -1.257  | 8.539 | 8.453  | 0.555 | 11.803  | 21.636 | 24.646 |
|                           | -     | -1.140 | 11.645 | -      | -     | -     | -      | -      | 0.813 | -2.974  | 8.542 | 3.110  | 0.618 | 10.853  | 20.416 | 23.122 |
|                           | -     | -      | -      | -      | -     | -     | -      | -      | 0.786 | -1.579  | 8.804 | 8.641  | 0.637 | 10.360  | 14.918 | 18.162 |

|         |       |        |        |        |       |         |        |        |       |        |       |        |       |        |        |        |
|---------|-------|--------|--------|--------|-------|---------|--------|--------|-------|--------|-------|--------|-------|--------|--------|--------|
|         | -     | -      | -      | -      | -     | -       | -      | -      | 0.785 | -2.560 | 8.666 | 8.941  | 0.613 | 10.816 | 16.113 | 19.406 |
|         | -     | -      | -      | -      | -     | -       | -      | -      | 0.802 | -0.547 | 8.558 | 8.307  | 0.557 | 11.562 | 19.827 | 22.952 |
|         | -     | -      | -      | -      | -     | -       | -      | -      | 0.809 | -1.216 | 8.600 | 8.627  | 0.564 | 11.427 | 19.163 | 22.312 |
|         | -     | -      | -      | -      | -     | -       | -      | -      | 0.789 | -2.230 | 8.550 | 8.533  | 0.611 | 10.846 | 18.767 | 21.676 |
|         | -     | -      | -      | -      | -     | -       | -      | -      | 0.806 | -0.816 | 8.848 | 8.396  | 0.584 | 11.083 | 11.924 | 16.279 |
|         | -     | -      | -      | -      | -     | -       | -      | -      | -     | -0.816 | 8.848 | 8.396  | -     | 11.925 | 21.505 | 24.590 |
| One-Cal | 0.938 | 0.000  | 4.895  | 4.895  | 0.075 | 5.337   | 21.039 | 21.705 | 0.816 | 8.620  | 8.621 | 11.728 | 0.716 | 8.202  | 14.031 | 16.253 |
|         | 0.882 | -0.377 | 6.721  | 6.687  | 0.087 | 5.337   | 24.270 | 24.850 | 0.776 | 8.620  | 8.621 | 7.983  | 0.638 | 8.202  | 14.031 | 16.253 |
|         | 0.653 | -0.279 | 11.831 | 11.435 | 0.045 | -12.043 | 21.078 | 23.933 | 0.815 | -0.395 | 8.706 | 7.983  | 0.638 | 8.189  | 14.232 | 16.420 |
|         | 0.531 | 4.056  | 13.380 | 13.978 | 0.000 | 5.326   | 23.333 | 16.683 | 0.815 | -1.884 | 8.703 | 8.337  | 0.630 | 8.093  | 13.142 | 15.434 |
|         | -     | -      | -      | -      | 0.011 | 5.424   | 15.312 | 18.075 | 0.801 | -0.388 | 9.041 | 8.404  | 0.709 | 8.117  | 12.164 | 14.624 |
|         | -     | -      | -      | -      | -     | 5.405   | 16.991 | -      | 0.781 | -2.120 | 8.827 | 8.836  | 0.739 | 8.038  | 12.895 | 15.195 |
|         | -     | -      | -      | -      | -     | -       | -      | -      | 0.764 | 1.982  | 8.668 | 8.069  | 0.692 | 8.264  | 14.145 | 16.382 |
|         | -     | -      | -      | -      | -     | -       | -      | -      | 0.802 | 1.435  | 8.976 | 8.241  | 0.647 | 8.130  | 13.036 | 15.363 |
|         | -     | -      | -      | -      | -     | -       | -      | -      | 0.804 | 1.809  | 8.930 | 8.818  | 0.658 | 7.987  | 12.415 | 14.762 |

|         |       |        |        |       |   |   |   |   |       |        |       |       |       |        |        |        |
|---------|-------|--------|--------|-------|---|---|---|---|-------|--------|-------|-------|-------|--------|--------|--------|
|         | -     | -      | -      | -     | - | - | - | - | 0.771 | -0.607 | 8.930 | 8.197 | 0.707 | 7.921  | 11.879 | 14.278 |
|         | -     | -      | -      | -     | - | - | - | - | 0.805 | -0.607 | 8.930 | 8.197 | 0.708 | 8.173  | 14.656 | 14.279 |
|         | -     | -      | -      | -     | - | - | - | - | 0.805 | -      | -     | -     | 0.605 | -      | -      | -      |
|         | -     | -      | -      | -     | - | - | - | - | 0.862 | -      | -     | -     | 0.688 | -      | -      | -      |
| One-Hop | 0.938 | 0.000  | 6.447  | 4.895 | - | - | - | - | 0.816 | 0.008  | 8.651 | 8.462 | 0.716 | -0.352 | 14.246 | 14.251 |
|         | 0.958 | -0.003 | 8.601  | 3.894 | - | - | - | - | 0.780 | 0.008  | 8.651 | 7.872 | 0.642 | -0.352 | 14.246 | 14.100 |
|         | 0.912 | 0.295  | 10.268 | 5.656 | - | - | - | - | 0.820 | 0.000  | 8.588 | 7.881 | 0.728 | 6.647  | 13.502 | 15.050 |
|         | 0.731 | -      | -      | 8.747 | - | - | - | - | 0.819 | 0.008  | 8.689 | 7.881 | 0.652 | -1.080 | 9.384  | 9.446  |
|         | -     | -      | -      | -     | - | - | - | - | 0.819 | 0.003  | 8.853 | 8.174 | 0.742 | 6.504  | 12.150 | 13.781 |
|         | -     | -      | -      | -     | - | - | - | - | 0.789 | 0.011  | 8.570 | 7.867 | 0.720 | 5.821  | 13.478 | 14.682 |
|         | -     | -      | -      | -     | - | - | - | - | 0.811 | 0.006  | 8.590 | 7.960 | 0.723 | 8.823  | 12.084 | 14.962 |
|         | -     | -      | -      | -     | - | - | - | - | 0.806 | 0.000  | 8.610 | 7.947 | 0.655 | 8.161  | 13.550 | 15.818 |
|         | -     | -      | -      | -     | - | - | - | - | 0.816 | -0.009 | 8.551 | 7.661 | 0.675 | 4.400  | 13.070 | 13.791 |
|         | -     | -      | -      | -     | - | - | - | - | 0.803 | 0.012  | 8.881 | 8.064 | 0.697 | 8.074  | 11.866 | 14.352 |
|         | -     | -      | -      | -     | - | - | - | - | 0.811 | 0.012  | 8.881 | 8.063 | 0.726 | 8.274  | 14.140 | 16.383 |

|  |   |   |   |   |   |   |   |   |       |   |   |   |           |   |   |   |
|--|---|---|---|---|---|---|---|---|-------|---|---|---|-----------|---|---|---|
|  | - | - | - | - | - | - | - | - | 0.811 | - | - | - | 0.6<br>28 | - | - | - |
|  | - | - | - | - | - | - | - | - | 0.872 | - | - | - | 0.7<br>06 | - | - | - |
